# Supplementary material
Source: PubMed Central journal article supplement (PMC4002095)
Supplement: supp_M113.533299_jbc.M113.533299-11.pdf [file supp_M113.533299_jbc.M113.533299-11.pdf]

**Transient contraction of mitochondria induces depolarization through the inner membrane dynamin OPA1 -- Hakjoo Lee and Yisang Yoon**

**Supplementary movie legends**

**Movie 1. TMRE flickering in DLP1-KO MEFs.** Wild type and DLP1-KO MEFs were labeled with TMRE and subjected to time-lapse imaging. Images were acquired at every 10 seconds. Movie plays at 5 frames/sec.

**Movie 2. Transient contraction of mitochondria tubules in DLP1-KO MEFs.** Mitochondrial matrix-targeted GFP was expressed in DLP1-KO MEFs and subjected to time-lapse imaging (10-second intervals). Movie plays at 1.5 frames/sec.

**Movie 3. Precise coincidence of mitochondrial contraction and TMRE loss.** TMRE and GFP dual time-lapse imaging (10-sec intervals) of mitochondria in DLP1-KO cells. Movie plays at 2 frames/sec.

**Movie 4. Mitochondrial contraction precedes TMRE loss.** TMRE and GFP dual time-lapse imaging of mitochondria in DLP1-KO cells. Images were acquired at every second. Movie plays at 5 frames/sec.

**Movie 5. Mitochondrial contraction-depolarization coupling in normal H9c2 cells.** TMRE and GFP dual time-lapse imaging (10-sec intervals) of mitochondria in H9c2 cells. Both complete and partial losses of TMRE are associated with mitochondrial contraction. Movie plays at 2 frames/sec.

**Movie 6. Prominent mitochondrial contractions in H9c2 expressing DLP1-K38A.** TMRE and GFP dual time-lapse imaging of mitochondria in H9c2 cells expressing DLP1-K38A. Images were acquired at 10-second intervals. Movie plays at 2 frames/sec.

**Movie 7. Antimycin A diminishes TMRE flickering in DLP1-KO MEFs.** DLP1-KO MEFs were labeled with TMRE and subjected to time-lapse imaging (10-sec intervals). Antimycin A was added at the frame 21. Movie plays at 5 frames/sec.

**Movie 8. Combination of pyruvate and oligomycin increases TMRE flickering in DLP1-KO MEFs after nutrient starvation.** DLP1-KO MEFs were nutrient-starved and labeled with TMRE for time-lapse imaging (10-sec intervals). Pyruvate/oligomycin was added at the frame 20. Movie plays at 7 frames/sec.

**Movie 9. OPA1 silencing diminishes TMRE flickering in DLP1-KO MEFs.** DLP1-KO MEFs stably expressing OPA1 shRNA were labeled with TMRE and subjected to time-lapse imaging. Images were acquired at every 10 seconds. Movie plays at 5 frames/sec.

**Movie 10. OPA1 silencing uncouples mitochondrial contraction and depolarization.** TMRE and GFP dual time-lapse imaging (10-sec intervals) of mitochondria in OPA1-KD/DLP1-KO cells. TMRE is retained in mitochondria during contractions. Movie plays at 2 frames/sec.
